# Supplementary material
Source: publisher figshare collection journal article supplement (https://frontiersin.figshare.com/ndownloader/files/23163260)
Supplement: Supplementary file [file 23163260]

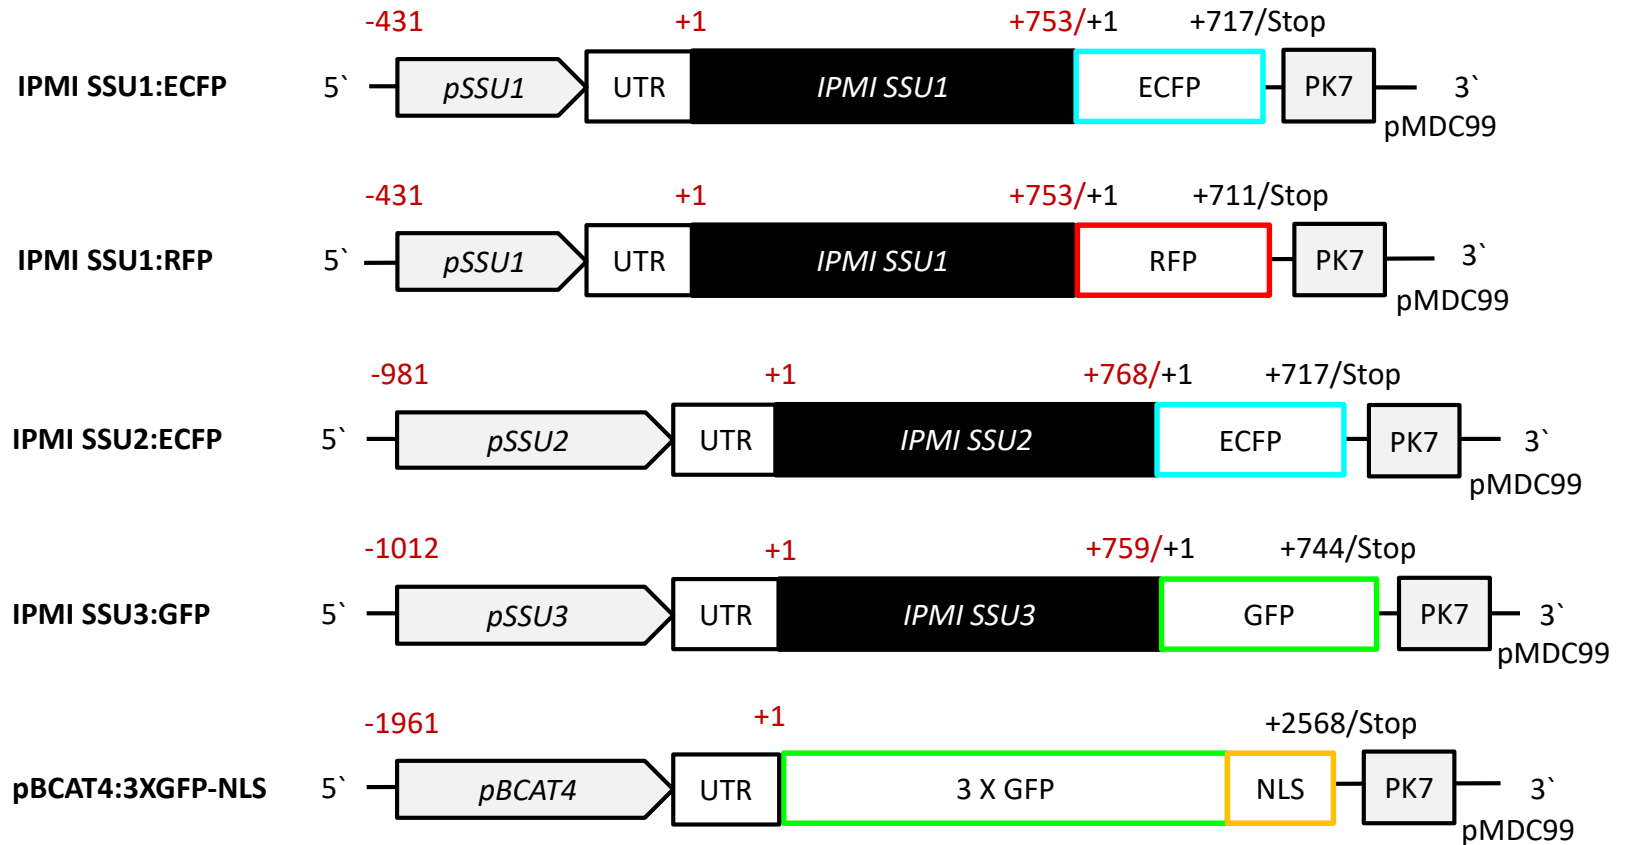

**Supplementary Figure. S2.** Reporter constructs used for expression analysis. Numbering is given with respect to the NATG (A = +1, N = -1). Numbers given in red delimit regions investigated, numbers given in black belong to the reading frames of the various fluorescent proteins.
